# Supplementary material for: Polymerization-tailored polyimides as cathodes for lithium-ion batteries
Source: Royal Society of Chemistry journal article supplement (doi:10.1039/d1ma00554e), 2021-01-01
Supplement: d1ma00554e1.pdf [file d1ma00554e1.pdf]

**Supporting information:**

## **Polymerization-tailored polyimides as cathodes for lithium-ion batteries**

**Sheng Lei,<sup>a</sup> Yanying Dong,<sup>b</sup> Yu Dou,<sup>a</sup> Xiaofang Zhang,<sup>\*b</sup> Qing Zhang,<sup>a</sup> and Yingkui Yang<sup>\*ab</sup>**

*<sup>a</sup> Key Laboratory of Catalysis and Energy Materials Chemistry of Ministry of Education & Hubei Key Laboratory of Catalysis and Materials Science, South-Central University for Nationalities, Wuhan 430074, China*

*E-mail: [ykyang@mail.scuec.edu.cn](mailto:ykyang@mail.scuec.edu.cn)*

*<sup>b</sup> Hubei Engineering Technology Research Centre of Energy Polymer Materials, School of Chemistry and Materials Science, South-Central University for Nationalities, Wuhan 430074, China*

*E-mail: [xfzhang@scuec.edu.cn](mailto:xfzhang@scuec.edu.cn)*

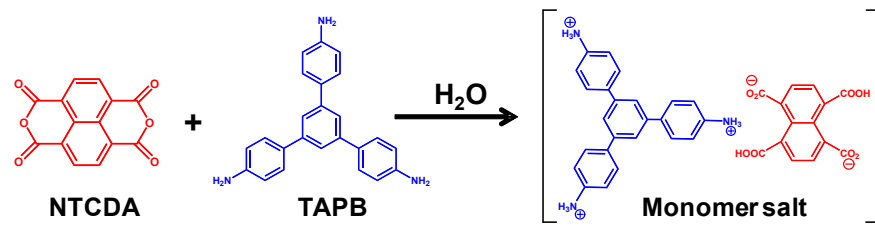

Fig. S1 Synthetic routes of monomer salt.

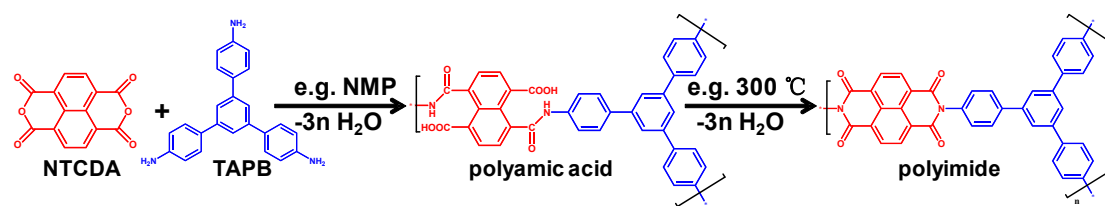

**Fig. S2** Synthetic route of polyimide by one-step polycondensation.

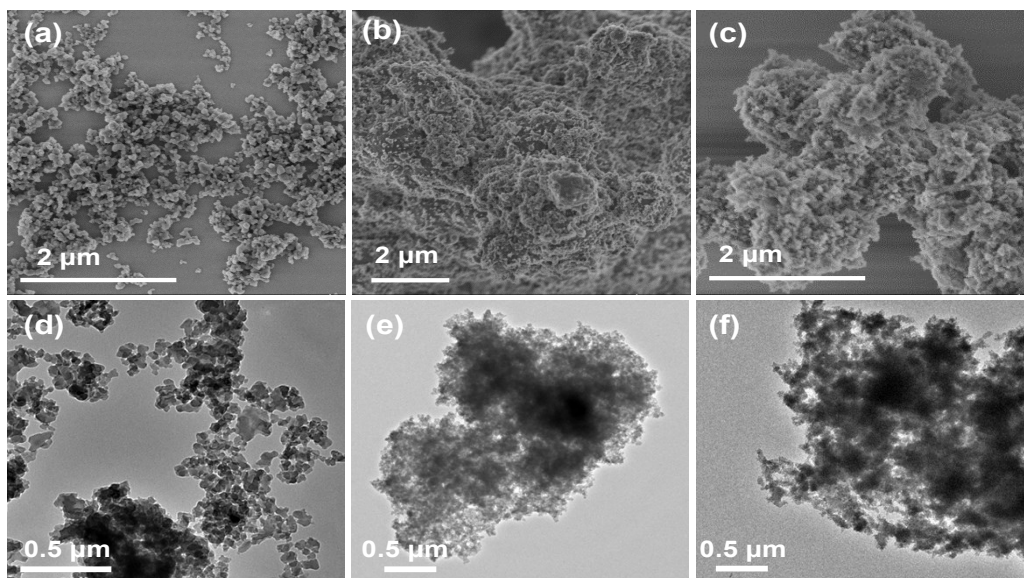

**Fig. S3** SEM images of (a) sPI, (b) cPI and (c) PI-COF. TEM images of (d) sPI, (e) cPI and (f) PI-COF.

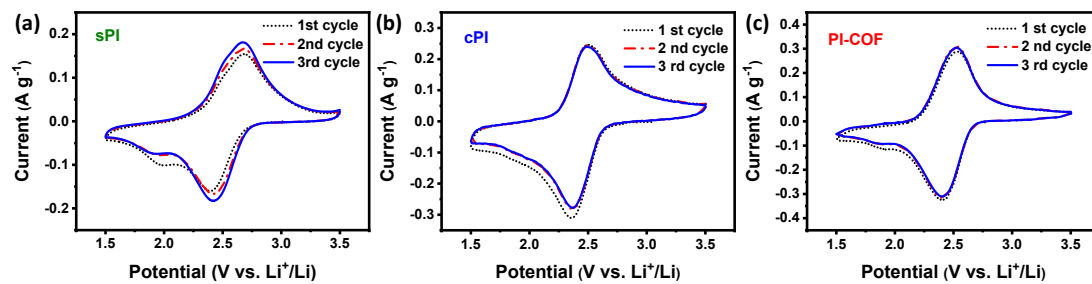

**Fig. S4** CV curves of the (a) sPI, (b) cPI and (c) PI-COF from 1st to 3rd cycles at a scan rate of 1  $\text{mV s}^{-1}$ .

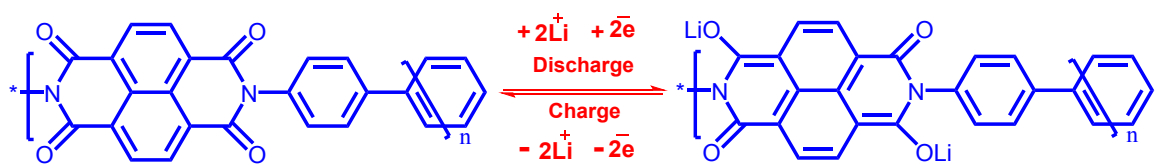

**Fig. S5** Electrochemical redox mechanism of PIs.

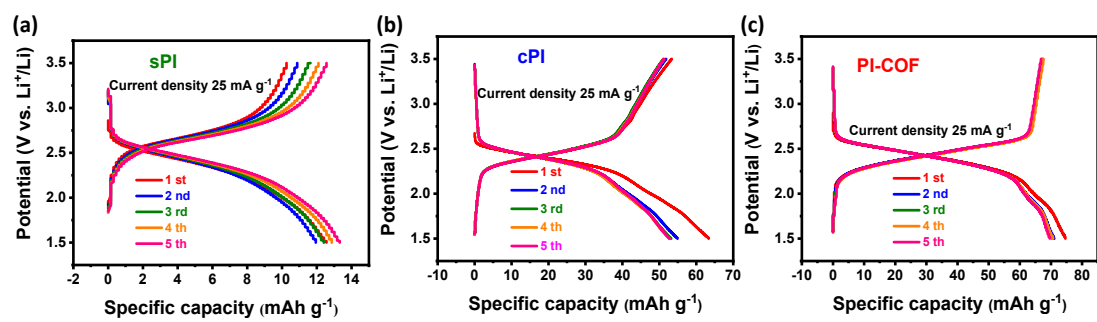

**Fig. S6** Discharge-charge curves of (a) sPI, (b) cPI and (c) PI-COF at current density of 25 mA g<sup>-1</sup>.

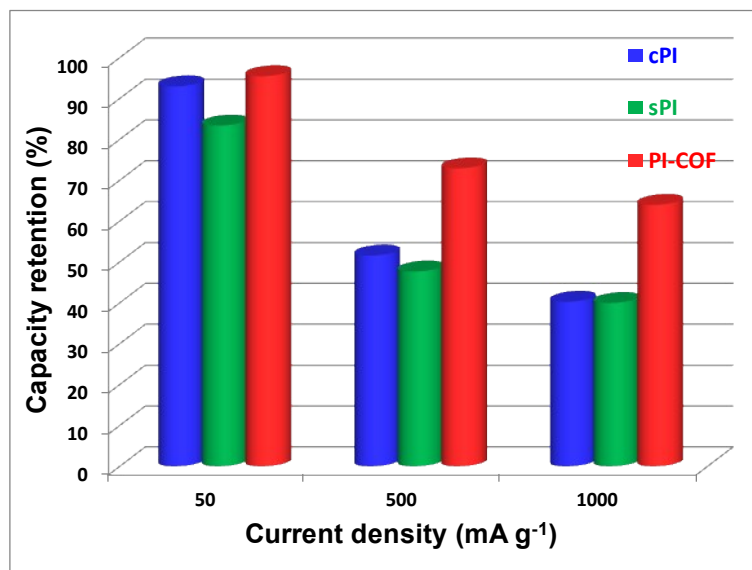

**Fig. S7** Retention of initial capacity at different current densities for sPI, cPI and PI-COF.



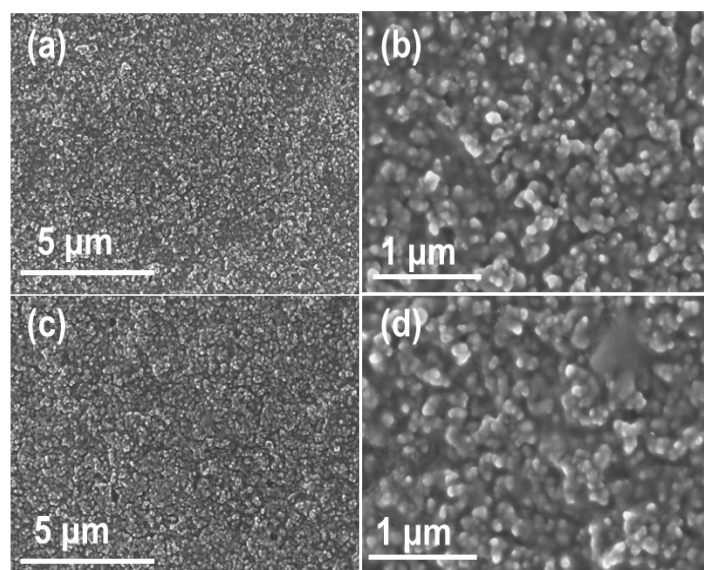

**Fig. S8** The SEM images of sPI cathodes (a, b) before and (c, d) after cycling.

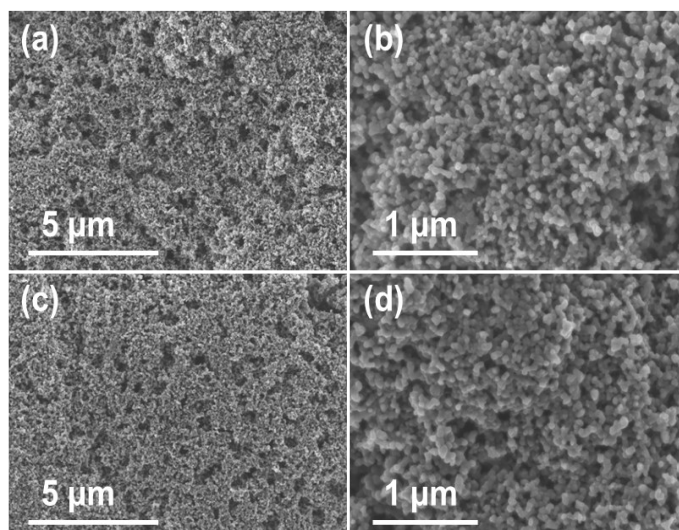

**Fig. S9** The SEM images of cPI cathodes (a, b) before and (c, d) after cycling.

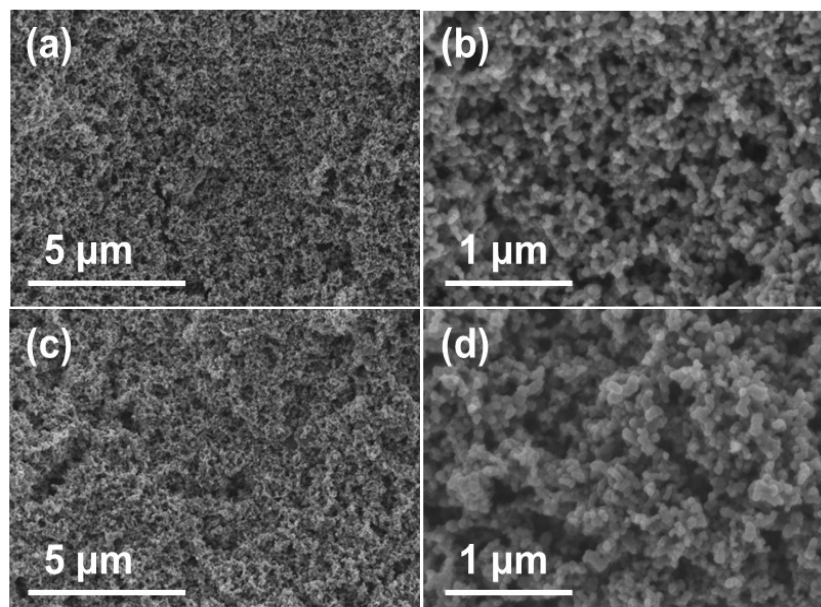

**Fig. S10** The SEM images of PI-COF cathodes (a, b) before and (c, d) after cycling.

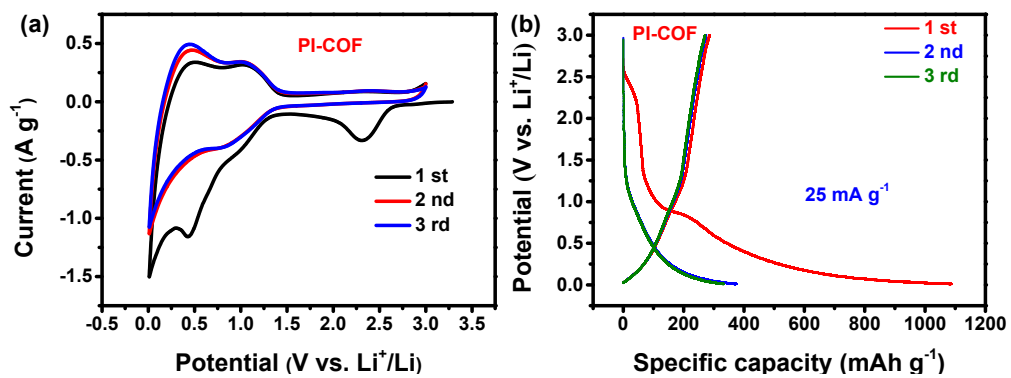

**Fig. S11** (a) CV curves of PI-COF anodes between 0.01 and 3.0 V at a scan rate of 1 mV s<sup>-1</sup>. (b) Charge-discharge curves of PI-COF anodes at current density of 25 mA g<sup>-1</sup> in a potential window of 0.01-3 V.

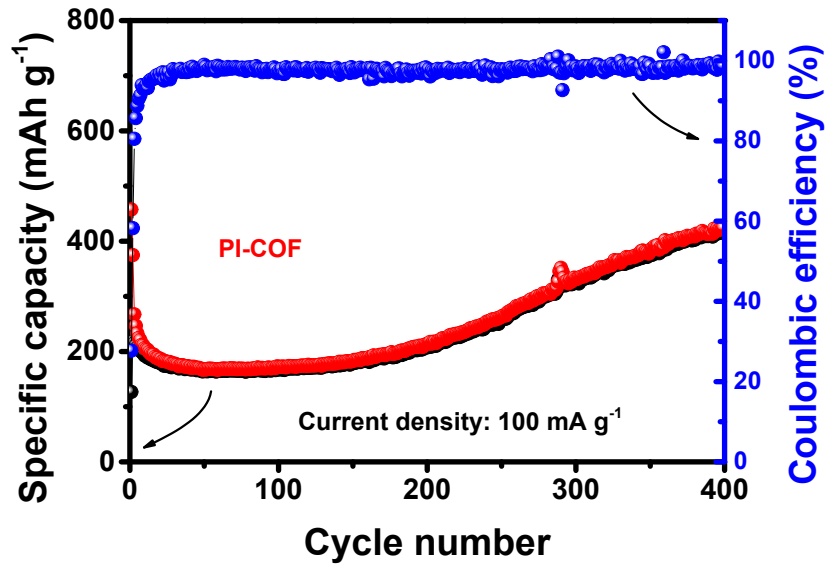

Fig. S12 Cycling performance of PI-COF anodes at 25 mA g<sup>-1</sup> between 0.01 and 3.0 V.

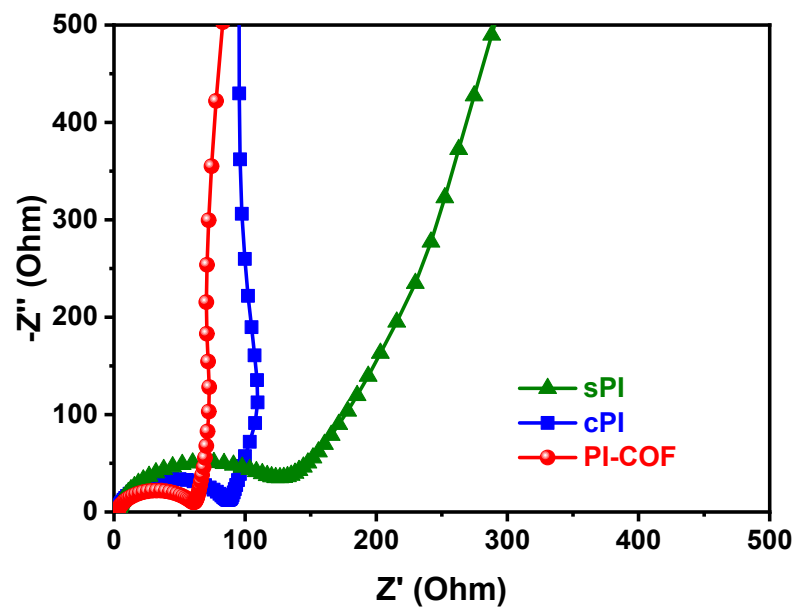

Fig. S13 (a) EIS profiles of sPI, cPI and PI-COF.

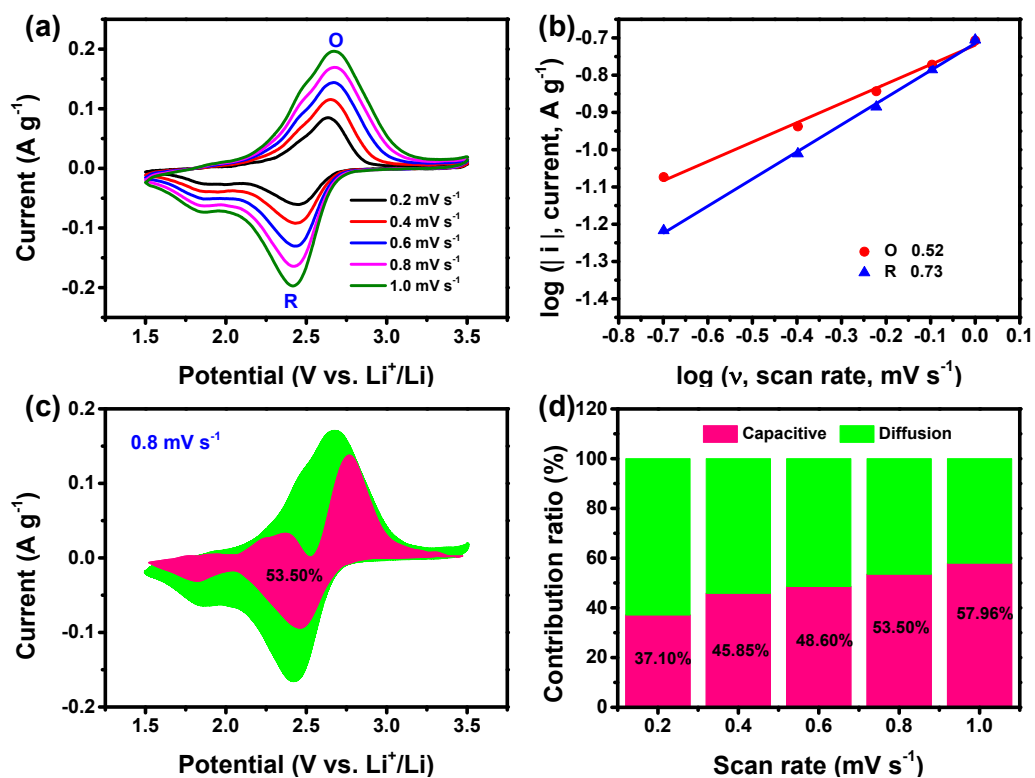

**Fig. S14** (a) CVs curves at different scan rates, (b)  $\log i$  vs  $\log v$  plots, (c) contribution ratios of capacitive- and diffusion-controlled behaviors and (d) capacitive and diffusion-controlled contribution to charge storage ( $0.8 \text{ mV s}^{-1}$ ) at different scan rate for sPI.

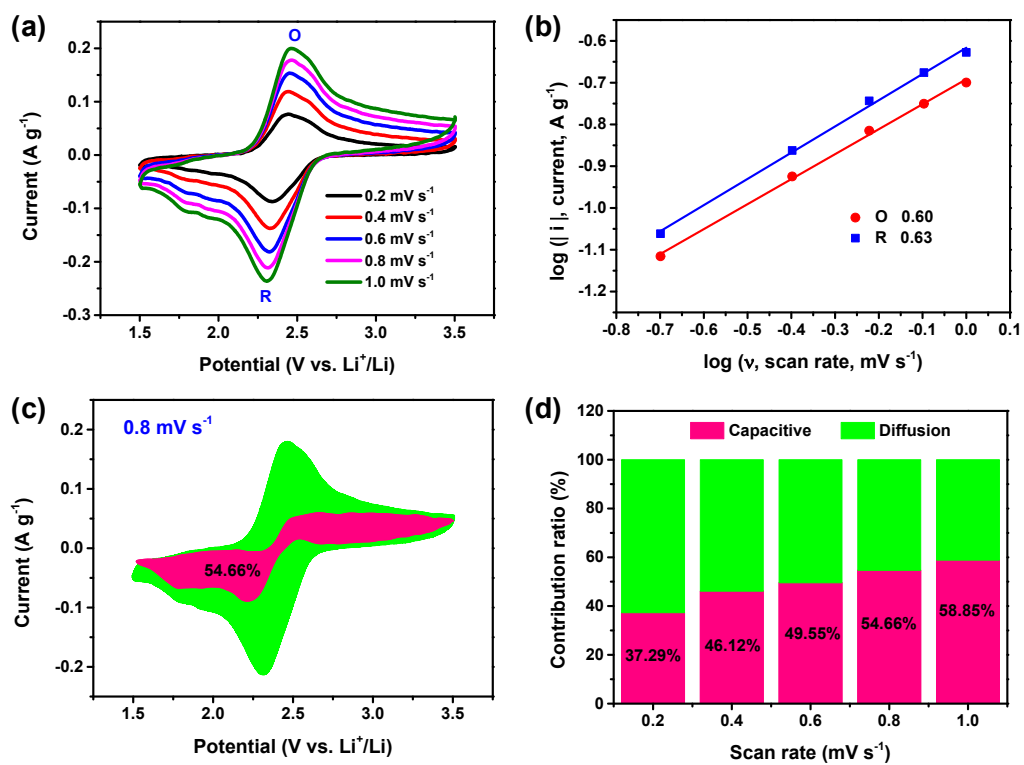

**Fig. S15** (a) CVs curves at different scan rates, (b)  $\log i$  vs  $\log v$  plots, (c) contribution ratios of capacitive- and diffusion-controlled behaviors and (d) capacitive and diffusion-controlled contribution to charge storage ( $0.8\ mV\ s^{-1}$ ) at different scan rate for cPI.



**Table S1.** A comparison in the electrochemical performance between as-prepared PIs and previous-reported polymer cathodes.

| Materials                                                                                        | Capacity                                           | Rate Capability                                   | Capacity Retention                                 | Capacity utilization | Ref. |
|--------------------------------------------------------------------------------------------------|----------------------------------------------------|---------------------------------------------------|----------------------------------------------------|----------------------|------|
| 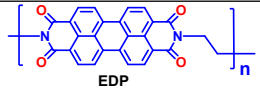<br>EDP         | 85 mAh g <sup>-1</sup> at 50 mA g <sup>-1</sup>    | 0 mAh g <sup>-1</sup> at 200 mA g <sup>-1</sup>   | 88.2% after 50 cycles at 50 mA g <sup>-1</sup>     | 65.8%                | [1]  |
| <br>PI-1        | 36 mAh g <sup>-1</sup> at 25 mA g <sup>-1</sup>    | -                                                 | -                                                  | 21.3%                | [2]  |
| <br>PI-3        | 78 mAh g <sup>-1</sup> at 25 mA g <sup>-1</sup>    | -                                                 | 74.1% after 65 cycles at 25 mA g <sup>-1</sup>     | 71.4%                |      |
| <br>PMTA/SWCNT | 160 mAh g <sup>-1</sup> at 38.3 mA g <sup>-1</sup> | 74 mAh g <sup>-1</sup> at 3.83 A g <sup>-1</sup>  | 86.6% after 200 cycles at 191.5 mA g <sup>-1</sup> | -                    | [3]  |
| <br>2D-PAI    | 28.5 mAh g <sup>-1</sup> at 100 mA g <sup>-1</sup> | -                                                 | 100% after 50 cycles at 100 mA g <sup>-1</sup>     | 22.6%                | [4]  |
| <br>P3        | 53 mAh g <sup>-1</sup> at 150 mA g <sup>-1</sup>   | 25 mAh g <sup>-1</sup> at 3.0 A g <sup>-1</sup>   | 28.0% after 200 cycles at 144 mA g <sup>-1</sup>   | -                    | [5]  |
| <br>PI2       | 134.9 mAh g <sup>-1</sup> at 25 mA g <sup>-1</sup> | 50 mAh g <sup>-1</sup> at 9.9 A g <sup>-1</sup>   | 87.5% after 5000 cycles at 198 mA g <sup>-1</sup>  | 54.3%                | [6]  |
| <br>PITs      | 80.5 mAh g <sup>-1</sup> at 25 mA g <sup>-1</sup>  | 56.5 mAh g <sup>-1</sup> at 1.0 A g <sup>-1</sup> | 70.3% after 15000 cycles at 1.5 A g <sup>-1</sup>  | 70%                  | [7]* |

|                                                                                                                                    |                                                            |                                                            |                                                           |              |                      |
|------------------------------------------------------------------------------------------------------------------------------------|------------------------------------------------------------|------------------------------------------------------------|-----------------------------------------------------------|--------------|----------------------|
|  <p style="text-align: center;"><b>PI-COF</b></p> | <b>70.6 mAh g<sup>-1</sup> at<br/>25 mA g<sup>-1</sup></b> | <b>47.0 mAh g<sup>-1</sup><br/>at 1.0 A g<sup>-1</sup></b> | <b>80% after 10000 cycles at<br/>1.5 A g<sup>-1</sup></b> | <b>61.4%</b> | <b>This<br/>work</b> |
|------------------------------------------------------------------------------------------------------------------------------------|------------------------------------------------------------|------------------------------------------------------------|-----------------------------------------------------------|--------------|----------------------|

\* The PITs were synthesized by hydrothermal polycondensation method. Hydrothermally self-templated synthesis of rectangular polyimide submicrotubes proposed by our previous work.

## Reference

- [1] P. Sharma, D. Damien, K. Nagarajan, M. M. Shaijumon and M. Hariharan, *J. Phys. Chem. Lett.*, 2013, **4**, 3192.
- [2] D. Tian, H. Z. Zhang, D. S. Zhang, Z. Chang, J. Han, X. P. Gao and X. H. Bu, *RSC Adv.*, 2014, **4**, 7506.
- [3] H. Wu, Q. Meng, Q. Yang, M. Zhang, K. Lu and Z. Wei, *Adv. Mater.*, 2015, **27**, 6504.
- [4] G. Wang, N. Chandrasekhar, B. P. Biswal, D. Becker, S. Paasch, E. Brunner, M. Addicoat, M. Yu, R. Berger and X. L. Feng, *Adv. Mater.*, 2019, 1901478.
- [5] T. B. Schon, A. J. Tilley, C. R. Bridges, M. B. Miltenburg and D. S. Seferos, *Adv. Funct. Mater.*, 2016, **26**, 6896.
- [6] H. G. Wang, S. Yuan, D. L. Ma, X. L. Huang, F. L. Meng and X. B. Zhang, *Adv. Energy Mater.*, 2014, **4**, 1301651.
- [7] Lei S, Cui X, Liu X, et al. Hydrothermally self-templated synthesis of rectangular polyimide submicrotubes and promising potentials in electrochemical energy storage. *Chem. Commun.*, 2020, **56**, 1429.
